# Supplementary material for: On the Solution to Riemann Hypothesis
Source: Preprints.org preprint supplement (doi:10.20944/preprints202301.0225.v1), 2023-01-12
Supplement: Supplementary file 1 [file supplementary]

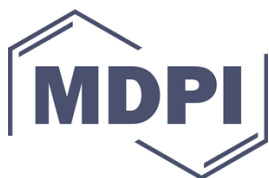

**Michael, Mark Anthony**  
617 Garcon Point road  
Milton 32583  
USA

# INVOICE

MDPI  
St. Alban-Anlage 66  
4052 Basel  
Switzerland  
Tel.: +41 61 683 77 34  
E-Mail: [billing@mdpi.com](mailto:billing@mdpi.com)  
Website: [www.mdpi.com](http://www.mdpi.com)  
VAT nr. CHE-115.694.943

Date of Invoice: 5 January 2023  
English Editing Invoice ID: english-58067  
Your Order: by e-mail ([uinvent@aol.com](mailto:uinvent@aol.com)) on 5 January 2023  
Article Title: On the Solution to Riemann Hypothesis  
Terms of payment: 2 days  
Due Date: 7 January 2023

| Description                          | Currency   | Amount        |
|--------------------------------------|------------|---------------|
| English editing (Rapid) , 1017 words | USD        | 184.51        |
| Layout editing                       | USD        | 81.16         |
| Plagiarism check                     | USD        | 54.10         |
| Subtotal without VAT                 | USD        | 319.77        |
| VAT (0%)                             | USD        | 0.00          |
| <b>Total with VAT</b>                | <b>USD</b> | <b>319.77</b> |

## Accepted Payment Methods

### 1. Online Payment by Credit Card in US Dollars (USD)

Please visit <https://payment.mdpi.com/english-58067> to pay by credit card. We accept payments in US Dollars (USD) made through VISA, MasterCard, Maestro, American Express, Diners Club and Discover.

### 2. Paypal in US Dollars (USD)

Please visit <https://payment.mdpi.com/payment/paypal/english/english-58067> and enter the payment details. Note that the fee for using Paypal is 5% of the invoiced amount.

Important: **Please contact [authorservicesbilling@mdpi.com](mailto:authorservicesbilling@mdpi.com) in the event of payment issues, or if you would prefer to pay using another payment method. Please provide the invoice ID (english-58067) when contacting our billing team.**

For detailed payment instruction, or for more alternative payment methods, visit the website at <https://www.mdpi.com/about/payment>.

Invoiced Amount in CHF: 295.51

Exchange rate applied to this invoice 5 January 2023: 0.92414 USD/CHF

Thank you for choosing MDPI.
